# Supplementary material for: Subliminal Emotional Faces Elicit Predominantly Right-Lateralized Amygdala Activation: A Systematic Meta-Analysis of fMRI Studies
Source: Front Neurosci. 2022 Jul 18;16:868366. doi: 10.3389/fnins.2022.868366 (PMC9339677; doi:10.3389/fnins.2022.868366)
Supplement: Supplementary file 3 [file Table_2.docx]

| | **Supplementary Table S2:** Rejected papers for ALE meta-analyses and narrative review | | | | | --- | --- | --- | --- | | **Study name** | **Authors** | **Year** | **Rejection Reason** | | Brain structures activated by overt and covert emotional visual stimuli. | Sabatini | 2009 | Participants conditioned to stimuli | | [Target visibility and visual awareness modulate amygdala responses to fearful faces.](https://pubmed.ncbi.nlm.nih.gov/15930371/) | Pessoa | 2006 | Participants conditioned to stimuli | | Implicitly and explicitly assessed anxiety: No relationships with recognition of and brain response to facial emotions. | Suslow | 2019 | Participants conditioned to stimuli | | [Amygdala excitability to subliminally presented emotional faces distinguishes unipolar and bipolar depression: an fMRI and pattern classification study.](https://pubmed.ncbi.nlm.nih.gov/24038516/) | Grotegerd | 2014 | No within contrasts | | [Amygdala Reactivity to Emotional Faces in the Prediction of General and Medication-Specific Responses to Antidepressant Treatment in the Randomized iSPOT-D Trial.](https://pubmed.ncbi.nlm.nih.gov/25824424/) | Williams | 2015 | No within contrasts | | [Amygdala Activation and Connectivity to Emotional Processing Distinguishes Asymptomatic Patients With Bipolar Disorders and Unipolar Depression.](https://pubmed.ncbi.nlm.nih.gov/30343134/) | Korgaonkar | 2019 | No within contrasts | | Distinct neural mechanisms of emotional processing in prolonged grief disorder. | Bryant | 2021 | No within contrasts | | [Using standardized fMRI protocols to identify patterns of prefrontal circuit dysregulation that are common and specific to cognitive and emotional tasks in major depressive disorder: first wave results from the iSPOT-D study.](https://pubmed.ncbi.nlm.nih.gov/23303059/) | Korgaonkar | 2013 | No within contrasts | | [Hypervigilance for fear after basolateral amygdala damage in humans.](https://pubmed.ncbi.nlm.nih.gov/22832959/) | Terburg | 2012 | No coordinates reported | | Behavioral and neural correlates of visual emotion discrimination and empathy in mild cognitive impairment. | Pernigo | 2015 | No coordinates for faces | | Real-Time Functional Magnetic Resonance Imaging Amygdala Neurofeedback Changes Positive Information Processing in Major Depressive Disorder. | Young | 2017 | No coordinates for baseline | | [Changes in the neural correlates of implicit emotional face processing during antidepressant treatment in major depressive disorder.](https://pubmed.ncbi.nlm.nih.gov/23809145/) | Victor et al. | 2013 | No baseline pre-treatment coordinates given | | [Emotional intelligence is associated with reduced insula responses to masked angry faces.](https://pubmed.ncbi.nlm.nih.gov/26053697/) | Alkozei & Killgore | 2015 | Correlation | | [Mood-congruent amygdala responses to subliminally presented facial expressions in major depression: associations with anhedonia.](https://pubmed.ncbi.nlm.nih.gov/23171695/) | Stuhrmann | 2013 | no comparison to neutral | | [Masked presentations of emotional facial expressions modulate amygdala activity without explicit knowledge.](https://pubmed.ncbi.nlm.nih.gov/9412517/) | Whalen | 1998 | no comparison to neutral | | [Amygdala activation to masked happy facial expressions.](https://pubmed.ncbi.nlm.nih.gov/19958569/) | Juruena | 2010 | no comparison to neutral | | [Emotion specific modulation of automatic amygdala responses by 5-HTTLPR genotype.](https://pubmed.ncbi.nlm.nih.gov/19962442/) | Dannlowski et al. | 2010 | no comparison to neutral | | [Preliminary report on the association between pulvinar volume and the ability to detect backward-masked facial features.](https://pubmed.ncbi.nlm.nih.gov/29097112/) | Kim | 2019 | Eye whites pooled with facial expressions. | | Amygdala activation and facial expressions: explicit emotion discrimination versus implicit emotion processing. | Habel | 2007 | No subliminal masking | | Facial expression primes and implicit regulation of negative emotion. | Yoon | 2015 | No subliminal masking | | Proactive engagement of cognitive control modulates implicit approach-avoidance bias. | Harlé | 2020 | No subliminal masking | | An event related functional magnetic resonance imaging study of facial emotion processing in Asperger syndrome. | Deeley | 2007 | No subliminal masking | | Age-related differences in brain activity during implicit and explicit processing of fearful facial expressions. | Zsoldos | 2016 | No subliminal masking | | Affective blindsight relies on low spatial frequencies. | Burra | 2019 | No subliminal masking | | Facial fear processing and psychotic symptoms in schizophrenia: functional magnetic resonance imaging study. | Michalopoulou | 2008 | No subliminal masking | | Functional similarity of facial emotion processing between people with a first episode of psychosis and healthy subjects. | Villalta-Gil | 2013 | No subliminal masking | | Neural circuitry of emotion regulation: Effects of appraisal, attention, and cortisol administration. | Ma | 2017 | No subliminal masking | | Cerebral differences in explicit and implicit emotional processing--an fMRI study. | Scheuerecker | 2007 | No subliminal masking | | Differential Modulation of Effective Connectivity in the Brain's Extended Face Processing System by Fearful and Sad Facial Expressions. | Jamieson | 2021 | No subliminal masking | | Psychopathy and functional magnetic resonance imaging blood oxygenation level-dependent responses to emotional faces in violent patients with schizophrenia. | Dolan | 2009 | No subliminal masking | | Dissociable brain correlates for depression, anxiety, dissociation, and somatization in depersonalization-derealization disorder. | Lemche | 2016 | No subliminal masking | | Attenuated responses to emotional expressions in women with generalized anxiety disorder. | Palm | 2011 | No subliminal masking | | Affect and neural activity in women with PTSD during a task of emotional interference. | Brown | 2016 | No subliminal masking | | Cognitive vulnerability and implicit emotional processing: imbalance in frontolimbic brain areas? | Groenewold | 2015 | No subliminal masking | | Visual cortical regions show sufficient test-retest reliability while salience regions are unreliable during emotional face processing. | McDermott | 2020 | No subliminal masking | | Neural correlates of anxiety sensitivity in panic disorder: A functional magnetic resonance imaging study. | Poletti | 2015 | No subliminal masking | | Dissociable patterns of medial prefrontal and amygdala activity to face identity versus emotion in bipolar disorder. | Keener | 2012 | No subliminal masking | | Neural basis of implicit memory for socio-emotional information in schizophrenia. | Schwartz | 2013 | No subliminal masking | | Neuronal correlates of emotional processing in patients with major depression. | Frodl | 2009 | No subliminal masking | | Blunted neural response to implicit negative facial affect in anorexia nervosa. | Leppanen | 2017 | No subliminal masking | | Effect of task conditions on brain responses to threatening faces in social phobics: an event-related functional magnetic resonance imaging study. | Straube | 2004 | No subliminal masking | | Explicit and implicit neural mechanisms for processing of social information from facial expressions: a functional magnetic resonance imaging study. | Critchley | 2000 | No subliminal masking | | Functional neural correlates of emotional expression processing deficits in behavioural variant frontotemporal dementia. | Virani | 2013 | No subliminal masking | | Cerebral and autonomic responses to emotional facial expressions in depersonalisation disorder. | Lemche | 2008 | No subliminal masking | | Effect of specific psychotherapy for chronic depression on neural responses to emotional faces. | Klein | 2014 | No subliminal masking | | Amygdala hypersensitivity in response to emotional faces in Tourette's patients. | Neuner | 2010 | No subliminal masking | | Temporal unpredictability of a stimulus sequence and the processing of neutral and emotional stimuli. | Koppe | 2015 | No subliminal masking | | Increased BOLD signal in the fusiform gyrus during implicit emotion processing in anorexia nervosa. | Fonville | 2013 | No subliminal masking | | Influence of Familial Risk for Depression on Cortico-Limbic Connectivity During Implicit Emotional Processing. | Wackerhagen | 2017 | No subliminal masking | | Prefrontal cortical response to emotional faces in individuals with major depressive disorder in remission. | Kerestes | 2012 | No subliminal masking | | Neural responses associated with positive and negative emotion processing in patients with left versus right temporal lobe epilepsy. | Batut | 2006 | No subliminal masking | | Developmental differences in neuronal engagement during implicit encoding of emotional faces: an event-related fMRI study. | Nelson | 2003 | No subliminal masking | |
| --- | --- | --- | --- | --- | --- | --- | --- | --- | --- | --- | --- | --- | --- | --- | --- | --- | --- | --- | --- | --- | --- | --- | --- | --- | --- | --- | --- | --- | --- | --- | --- | --- | --- | --- | --- | --- | --- | --- | --- | --- | --- | --- | --- | --- | --- | --- | --- | --- | --- | --- | --- | --- | --- | --- | --- | --- | --- | --- | --- | --- | --- | --- | --- | --- | --- | --- | --- | --- | --- | --- | --- | --- | --- | --- | --- | --- | --- | --- | --- | --- | --- | --- | --- | --- | --- | --- | --- | --- | --- | --- | --- | --- | --- | --- | --- | --- | --- | --- | --- | --- | --- | --- | --- | --- | --- | --- | --- | --- | --- | --- | --- | --- | --- | --- | --- | --- | --- | --- | --- | --- | --- | --- | --- | --- | --- | --- | --- | --- | --- | --- | --- | --- | --- | --- | --- | --- | --- | --- | --- | --- | --- | --- | --- | --- | --- | --- | --- | --- | --- | --- | --- | --- | --- | --- | --- | --- | --- | --- | --- | --- | --- | --- | --- | --- | --- | --- | --- | --- | --- | --- | --- | --- | --- | --- | --- | --- | --- | --- | --- | --- | --- | --- | --- | --- | --- | --- | --- | --- | --- | --- | --- | --- | --- | --- | --- | --- | --- | --- | --- | --- | --- | --- | --- | --- | --- | --- | --- | --- | --- | --- | --- | --- | --- | --- | --- | --- |
